# Supplementary material
Source: Springer Nature journal article supplement (https://www.springermedizin.de/resource/supplementary/12894_2013_302_MOESM7_ESM.pdf/9513430)
Supplement: MOESM7 [file 9513430]

**Stage 1:** N= 323; n cases =179, n controls = 144

- Genotype 46 pre-defined prostate cancer risk alleles
- Study Power\*: 16%

**Bantu groups:** Tsonga, Pedi, Venda, Tswana

**Clinics:** Polokwane, Tshilidzini

**Stage 2:** N= 503; n cases =297, n controls = 206

- Follow-up analysis of SNPs achieving un-adjusted P-value $\leq$ 0.05 in stage 1.
- Genetic risk models evaluated by receiver operator characteristic curve.
- Study Power\*: 21%

**Bantu groups:** Tsonga, Pedi, Venda, Tswana

**Clinics:** Polokwane, Tshilidzini, SBAH/MEDUNSA

**Stage 3:** N= 837; n cases =522, n controls = 315

- Analysis of epidemiological features for association with over-all risk as well as tumor characteristics (Gleason score and grade).
- Study Power\*: 31%

**Bantu groups:** Tsonga, Pedi, Venda, Tswana,  
Ndebele, Xhosa, Zulu, Sotho, Swati

**Clinics:** Polokwane, Tshilidzini, SBAH/MEDUNSA
